# Supplementary material
Source: PubMed Central journal article supplement (PMC3470854)

**Supplemental Table 1. IC<sub>50</sub> and  $\alpha$  coefficient values from response surface models. [**

| MDA-MB-231   |           |          |
|--------------|-----------|----------|
| das+ixa      | das (nM)  | 1.96E+02 |
|              | ixa (nM)  | 6.665    |
|              | $\alpha$  | 40.87    |
| das+LY294002 | das (nM)  | 220.6    |
|              | pi3k (nM) | 6.05E+06 |
|              | $\alpha$  | 6824     |
| das+pac      | das (nM)  | 7.11E+01 |
|              | pac (nM)  | 4.306    |
|              | $\alpha$  | 19.74    |
| das+rap      | das (nM)  | 1.21E+02 |
|              | rap (nM)  | 2.51E+06 |
|              | $\alpha$  | 2.34E+05 |
| das+sor      | das (nM)  | 153.2    |
|              | sor (nM)  | 4.90E+05 |
|              | $\alpha$  | 7530     |
| das+tam      | das (nM)  | 284.7    |
|              | tam (nM)  | 3.58E+06 |
|              | $\alpha$  | 2129     |
| das+U0126    | das (nM)  | 204.4    |
|              | mek (nM)  | 1.27E+06 |
|              | $\alpha$  | 4055     |

| MCF-7        |           |          |
|--------------|-----------|----------|
| das+ixa      | das (nM)  | 1.38E+04 |
|              | ixa (nM)  | 3145     |
|              | $\alpha$  | 299.8    |
| das+LY294002 | das (nM)  | 5966     |
|              | pi3k (nM) | 1.84E+04 |
|              | $\alpha$  | 8.819    |
| das+pac      | das (nM)  | 2.83E+04 |
|              | pac (nM)  | 70.53    |
|              | $\alpha$  | 967.5    |
| das+rap      | das (nM)  | 6.30E+04 |
|              | rap (nM)  | 445.5    |
|              | $\alpha$  | 152.1    |
| das+sor      | das (nM)  | 687.1    |
|              | sor (nM)  | 7096     |
|              | $\alpha$  | 1.762    |
| das+tam      | das (nM)  | 1375     |
|              | tam (nM)  | 5496     |
|              | $\alpha$  | 3.161    |
| das+U0126    | das (nM)  | 1166     |
|              | mek (nM)  | 8817     |
|              | $\alpha$  | 0.488    |

**Supplemental Text 1. Matlab code for surface response plots**

```
clear all
close all
clc

das = [0 10 100 1000 5000 0 0 0 0 0 10 100 1000 5000];
drug2 = [0 0 0 0 0 10 100 1000 5000 0 10 100 1000 5000];

fa = [0
0.270214236
0.465100207
0.595024188
0.701451279
0
0.520387008
0.682791983
0.732550104
0.779543884
0
0.577055978
0.780926054
0.823082239
0.869384934];

das=das';
drug2=drug2';

% http://www.mathworks.de/access/helpdesk/help/toolbox/curvefit/brvixm6-1.html#br72xv2-1
ft = fitttype( 'Emax*( CA/IC50A + CB/IC50B + alpha*( CA/IC50A ) * ( CB/IC50B ) )^n /((
CA/IC50A + CB/IC50B + alpha*( CA/IC50A ) * ( CB/IC50B ) )^n + 1 )', ...
'indep', {'CA', 'CB'}, 'depend', 'z', 'problem', 'Emax' )
coeffnames(ft) % {'IC50A','IC50B','alpha','n'}
Emax = 1;
opts = fitoptions(ft);
opts.Upper = [Inf Inf Inf 1];
opts.Lower = [0 0 0 0];
opts.Robust = 'LAR';
opts.StartPoint = [200 3 5 0.5];
f1=fit([das,drug2],fa, ft, opts, 'problem', Emax)

plot(f1,[das,drug2],fa)
xlabel('Dasatinib [nM]');
ylabel('Ixabepilone [nM]');
zlabel('Effect');
title('MDA-MB-231 Response Surface Model');

figure;
plot(f1,[das,drug2],fa,'Style', 'Contour' );
xlabel('Dasatinib [nM]');
ylabel('Ixabepilone [nM]');
title('MDA-MB-231 Response Contour');
colorbar;
das_conc=1000;
drug2_conc=200;
axis([0 das_conc 0 drug2_conc])
```

**Supplemental Figure 1. Cell cycle analysis in MDA-MB-231 cells following 48 hr treatment with single agent and dasatinib-based combination.**

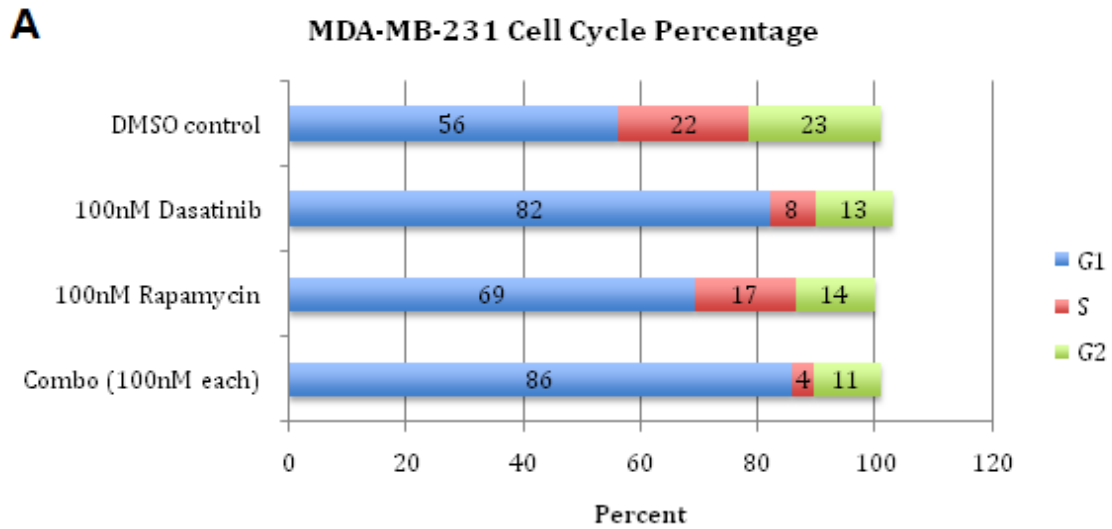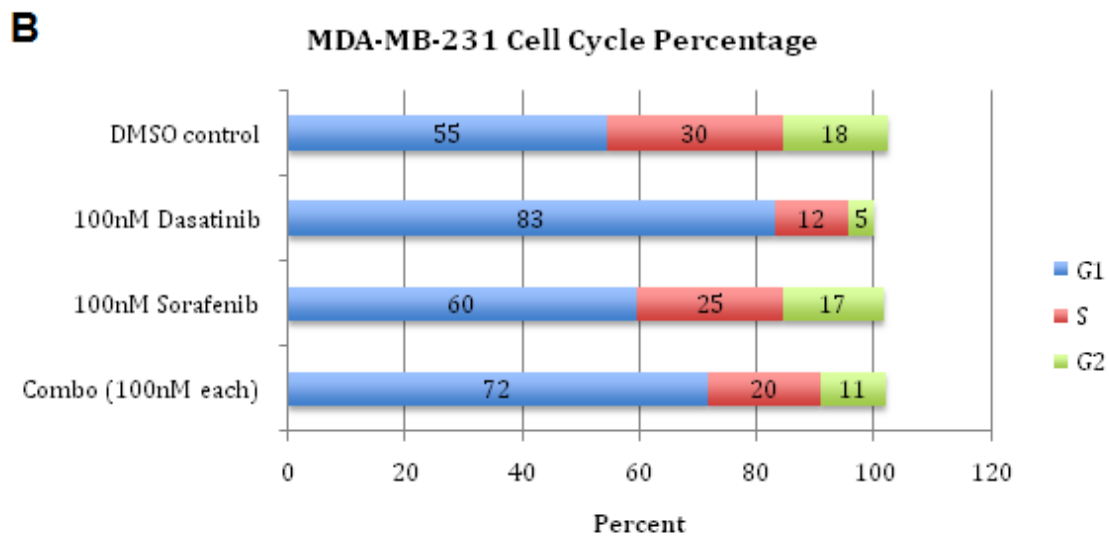

**Supplemental Figure 2. Two dimensional plots were created for drug combinations using MatLab software.**

**A. Dose-Response Plots of dasatinib and ixabepilone in MDA-MB-231 Cells**

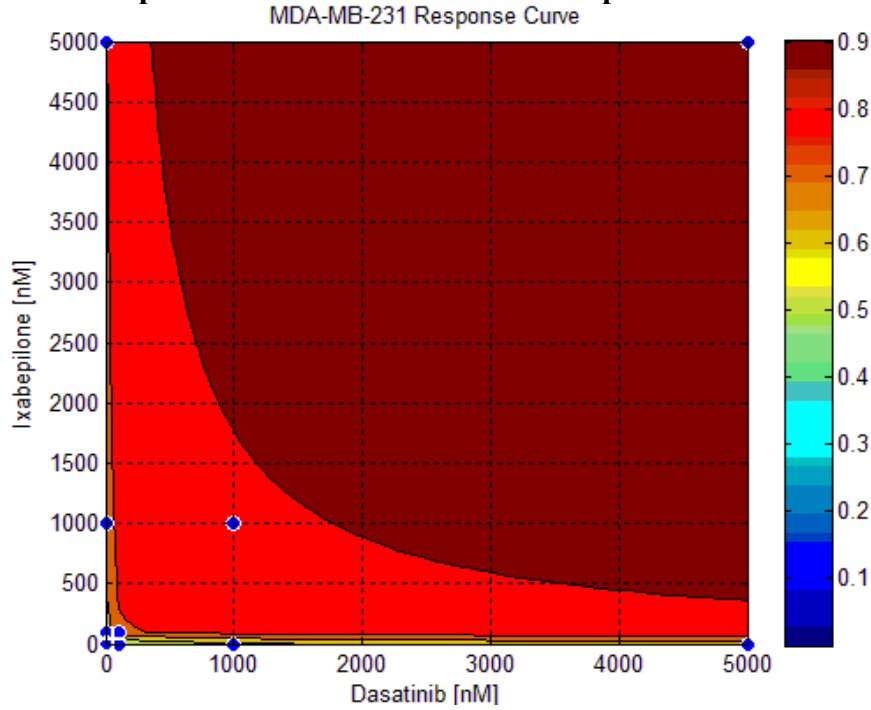

**B. Dose-Response of dasatinib and MEK inhibitor in MDA-MB-231 cells**

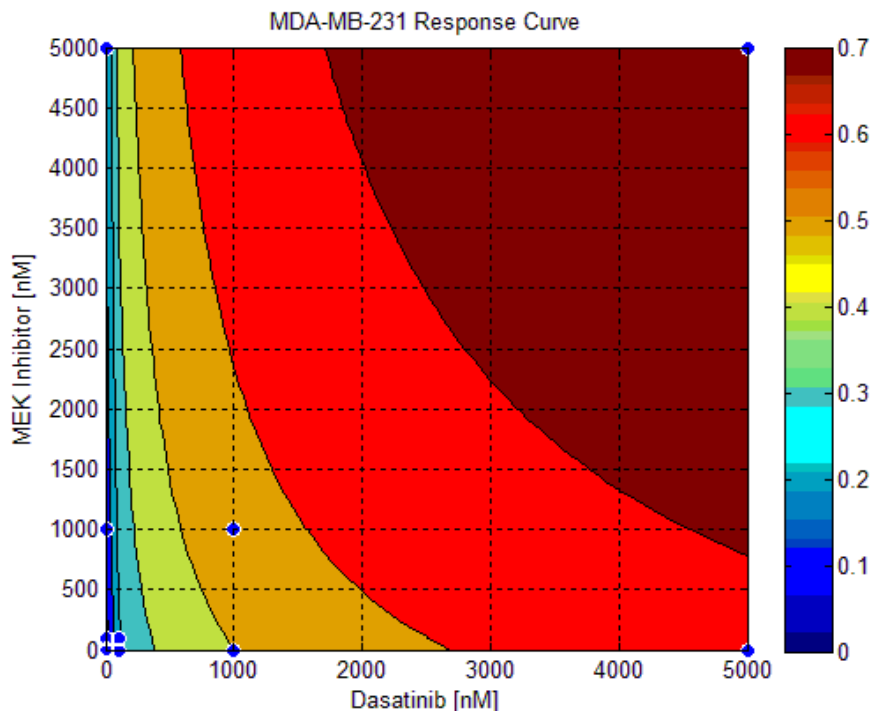

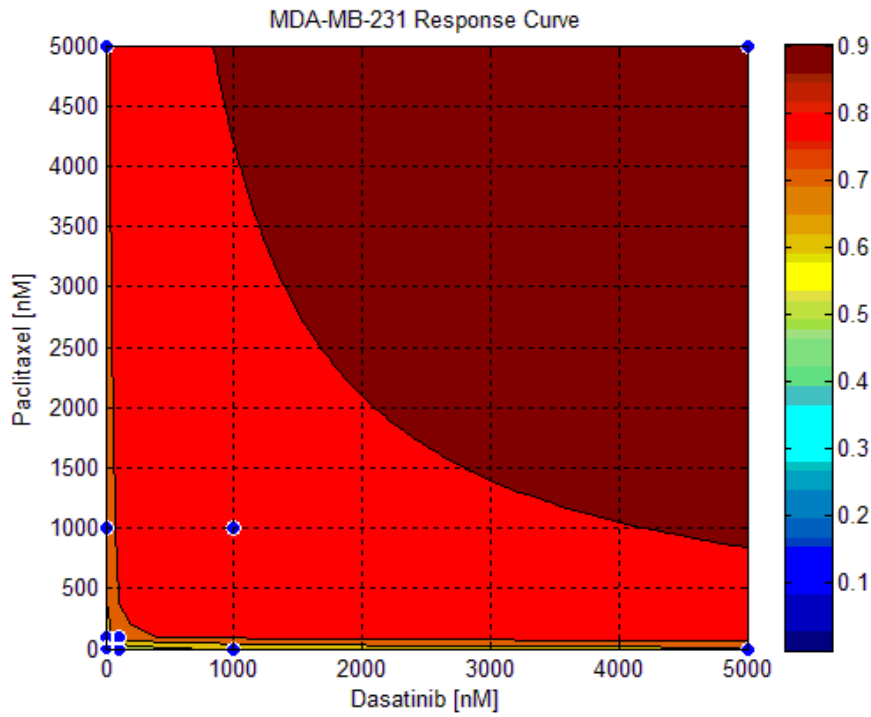

**C. Dose Response of dasatinib and paclitaxel in MDA-MB-231 cells**

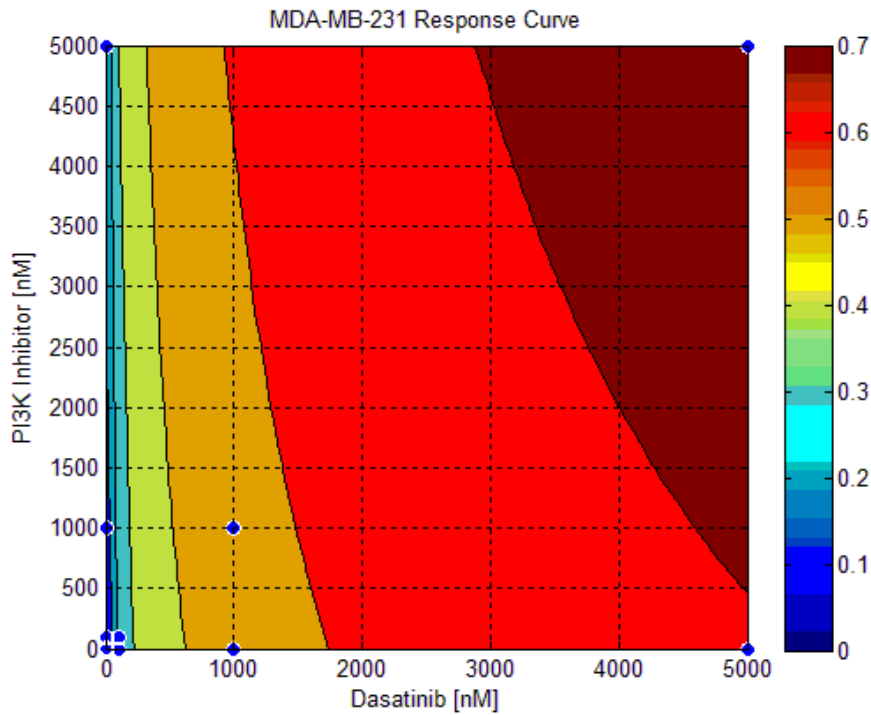

**D. Dose Response of dasatinib and PI 3-Kinase inhibitor in MDA-MB-231 cells**

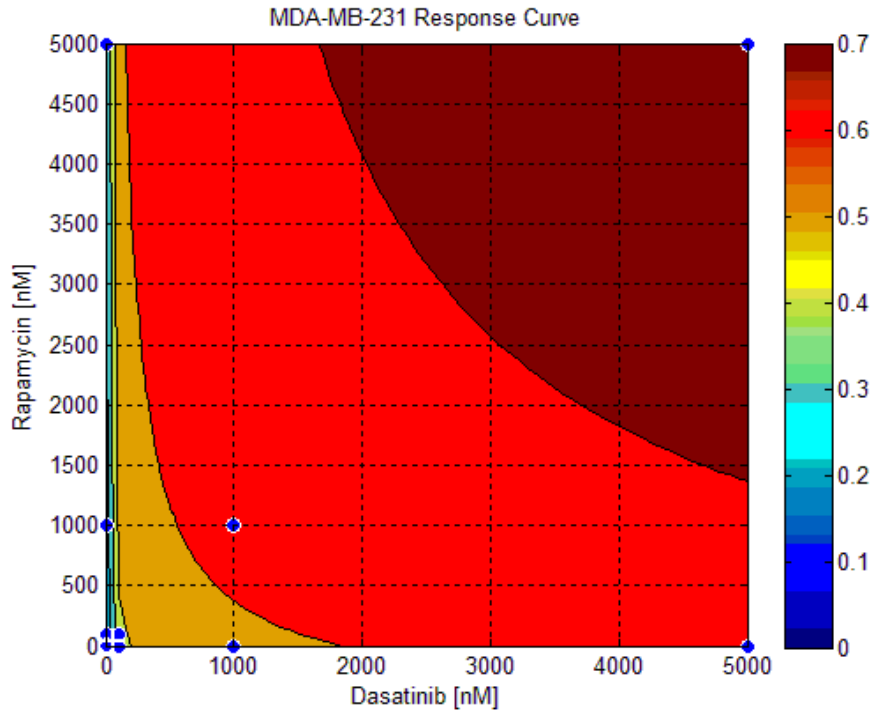

**E. Dose Response of dasatinib and rapamycin in MDA-MB-231 cells**

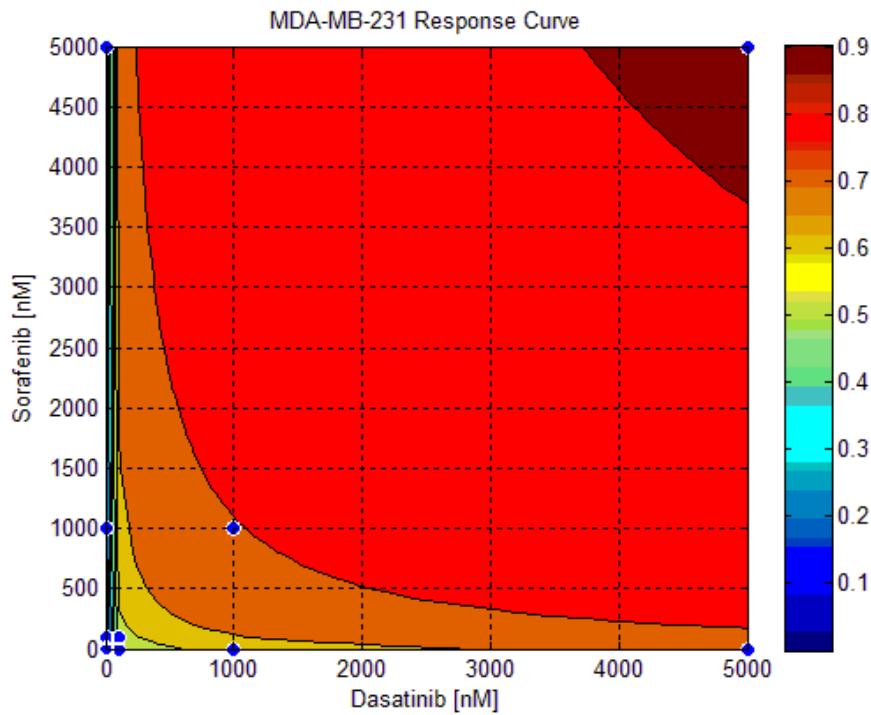

**F. Dose Response of dasatinib and sorafenib in MDA-MB-231 cells**

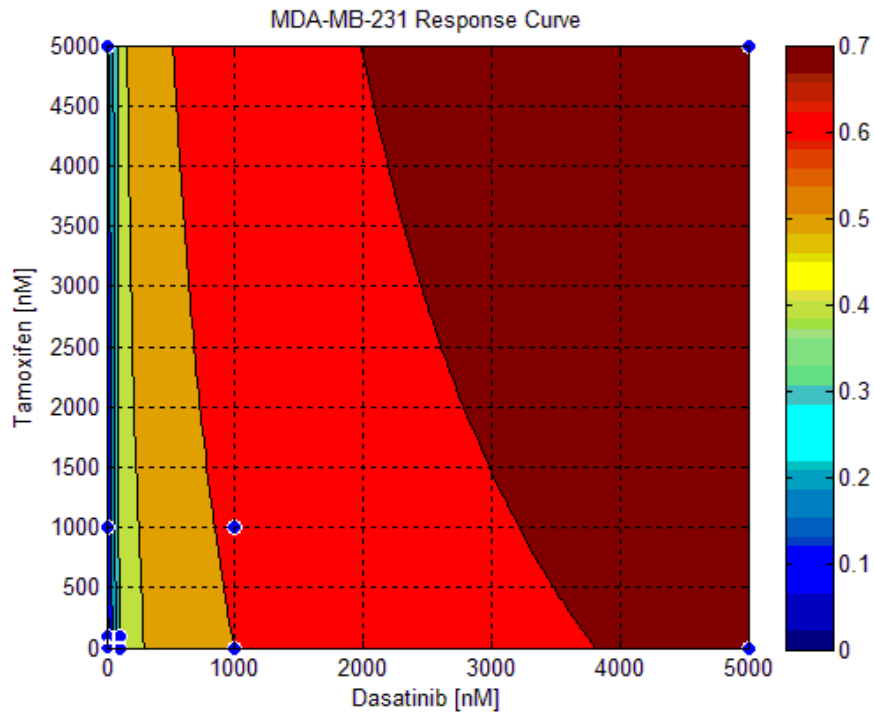

**G. Dose Response of dasatinib and tamoxifen in MDA-MB-231 cells**

### H. Dose-Response Plots of dasatinib and ixabepilone in SK-BR-3 Cells

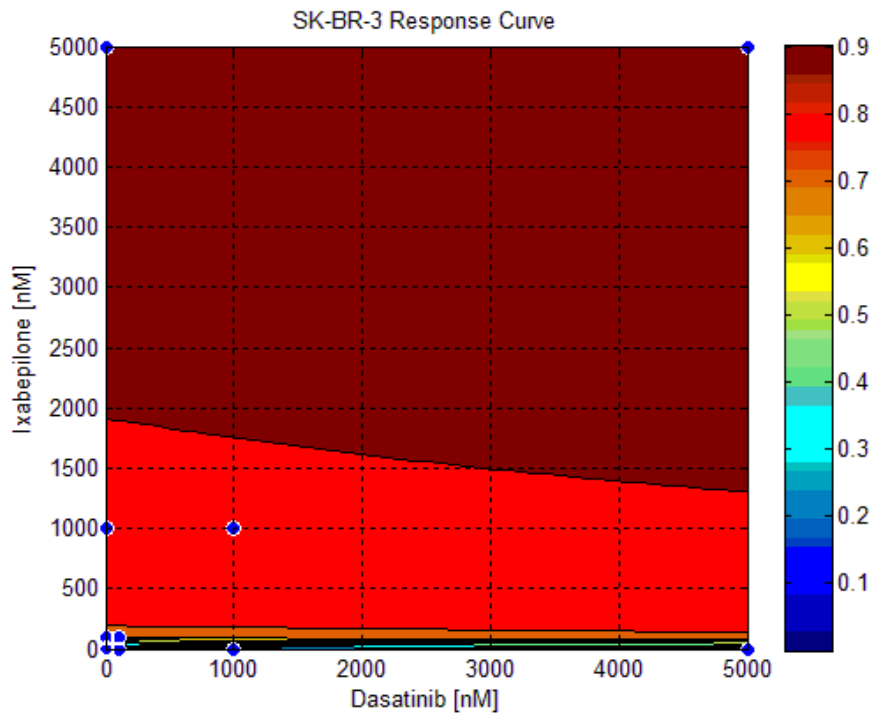

Figure I. Dose Response of dasatinib and paclitaxel in SK-BR-3 cells

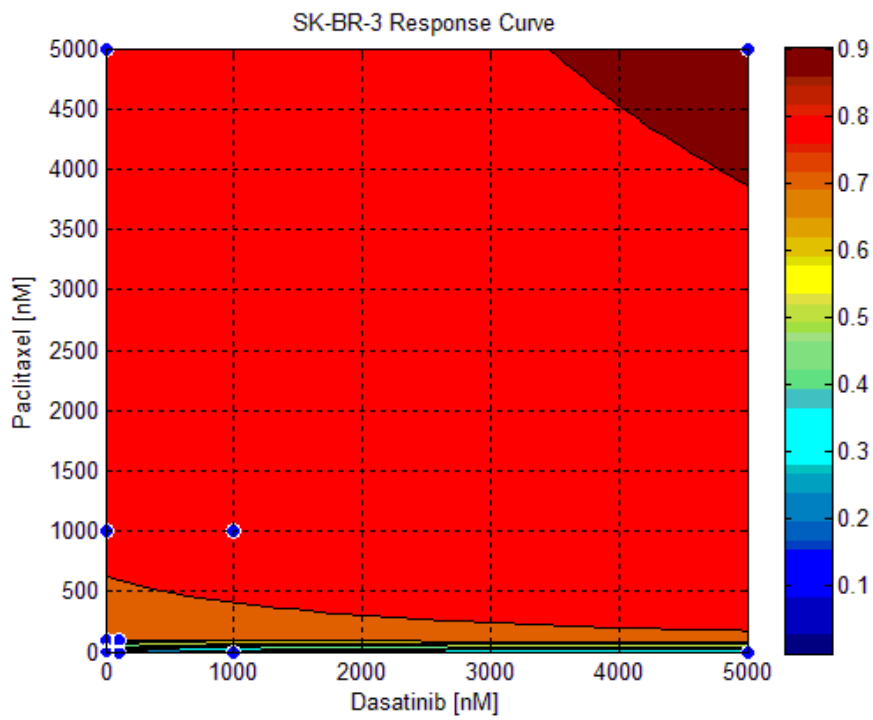



**J. Dose Response of dasatinib and rapamycin in SK-BR-3 cells**

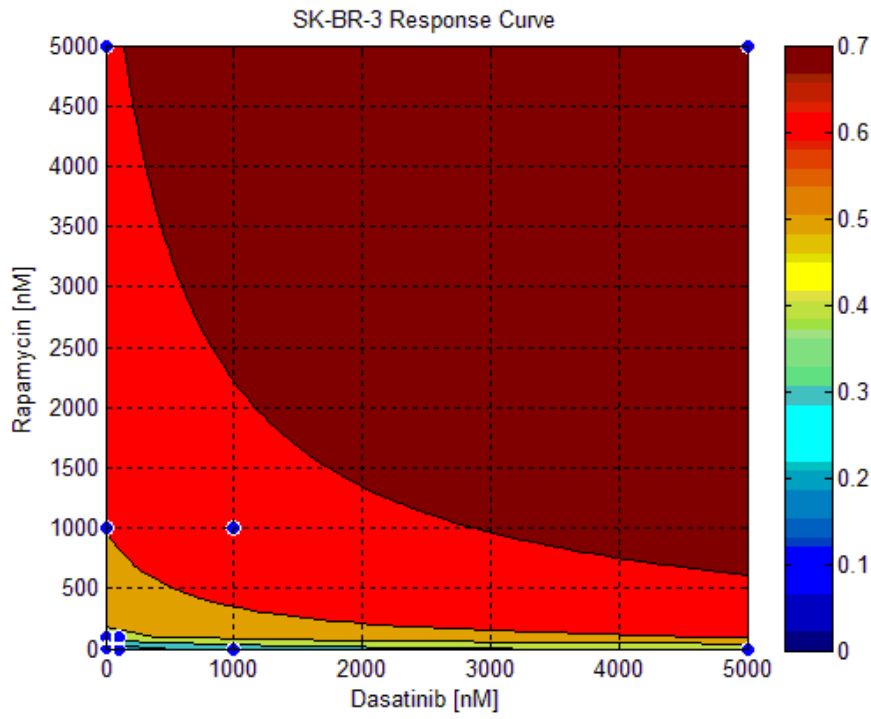

**K. Dose Response of dasatinib and sorafenib in SK-BR-3 cells**

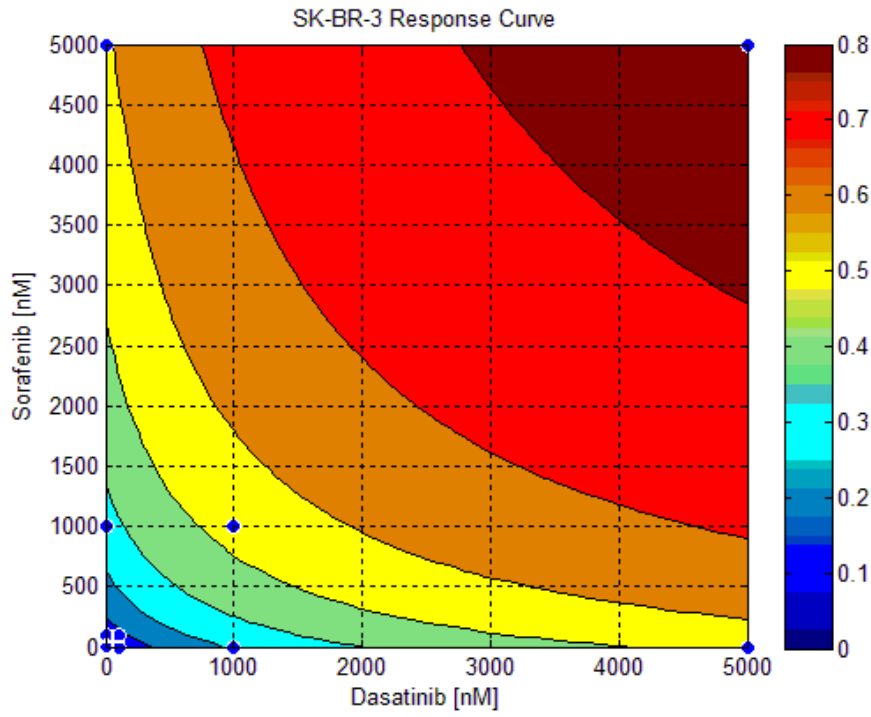

**L. Dose Response of dasatinib and U0126 in SK-BR-3 cells**

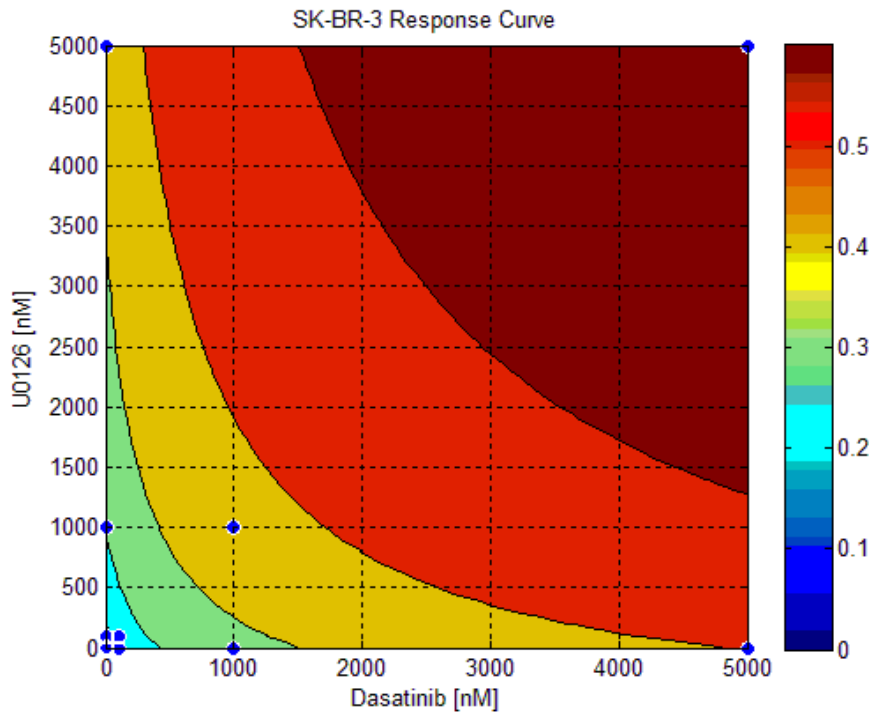

**M. Dose Response of dasatinib and PI 3-kinase inhibitor in SK-BR-3 cells**

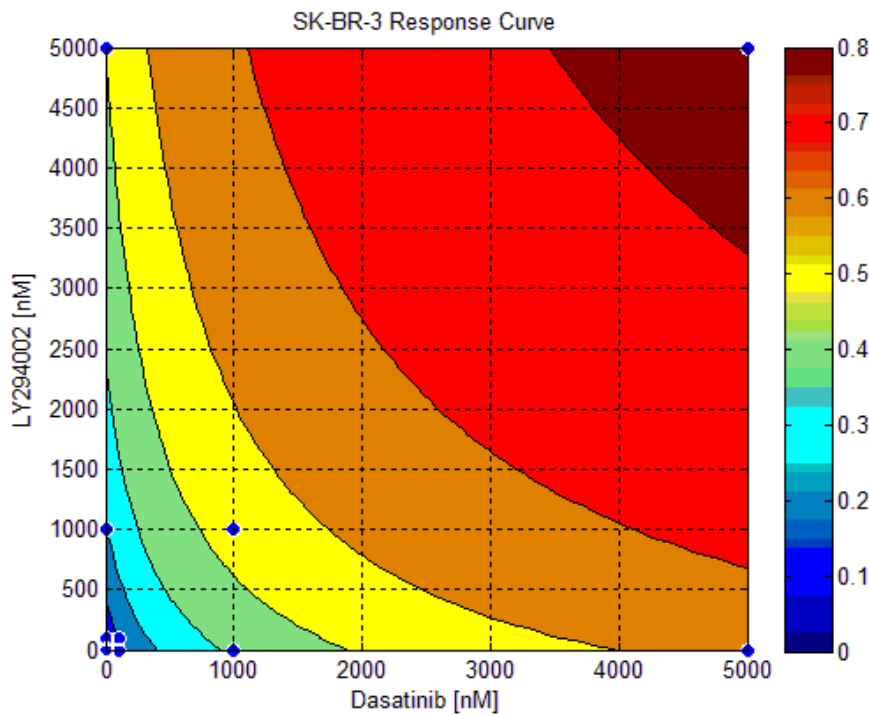

**N. Dose Response of dasatinib and tamoxifen in SK-BR-3 cells**

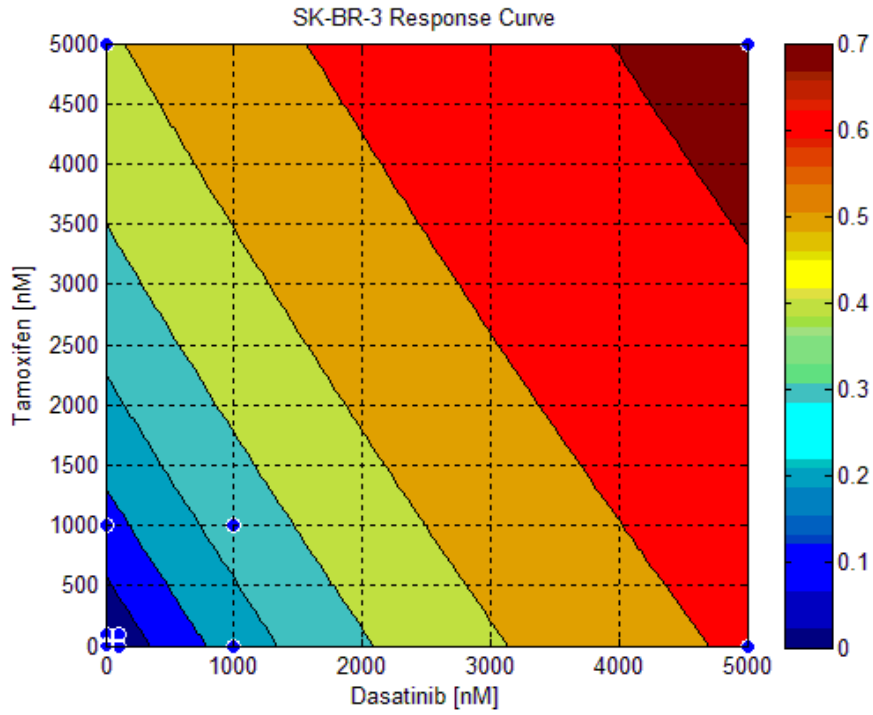

**O. Dose Response of dasatinib and rapamycin in MCF-7 cells.**

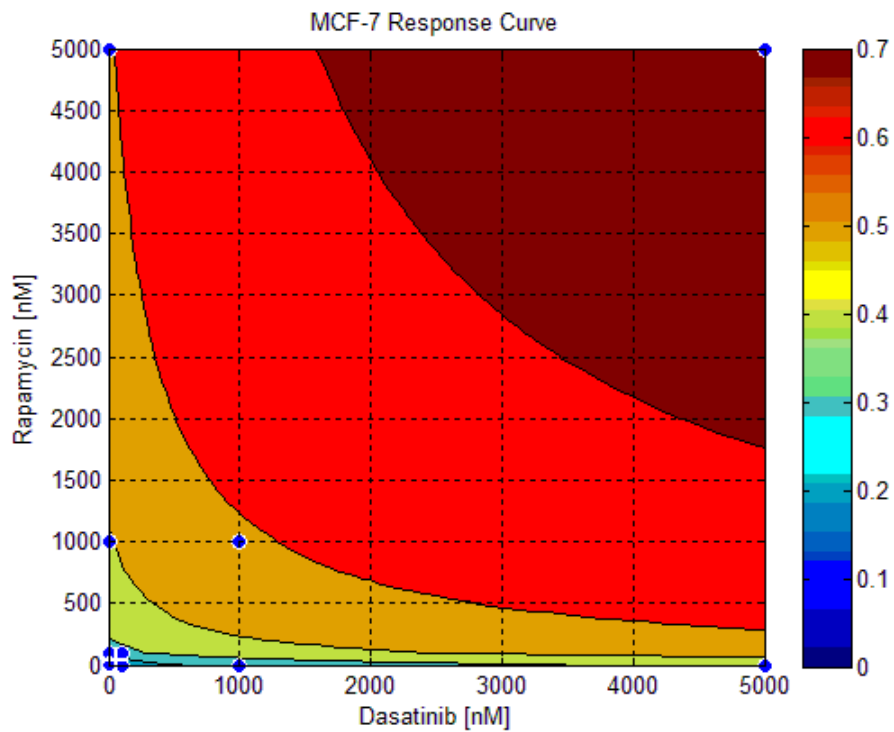

**P. Dose Response of dasatinib and sorafenib in MCF-7 cells.**

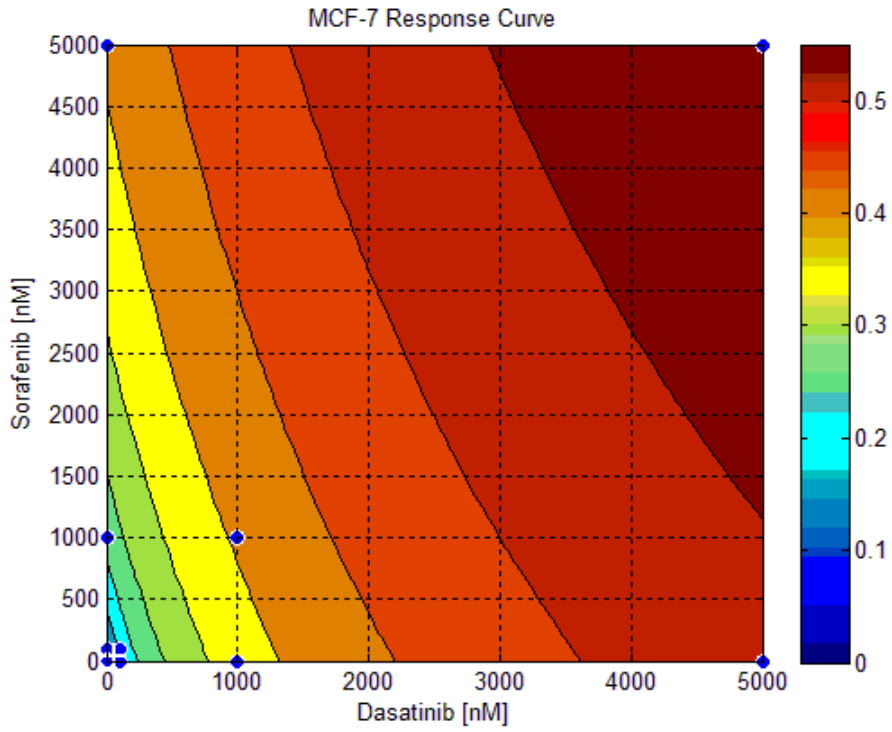

**Q. Dose Response of dasatinib and paclitaxel in MCF-7 cells.**

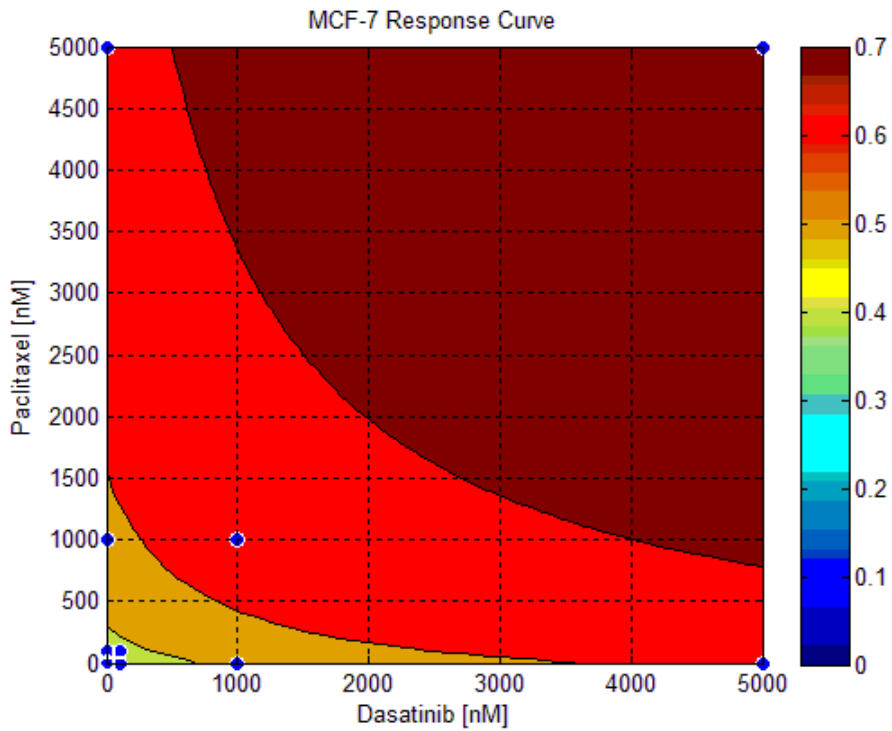

**R. Dose Response of dasatinib and ixabepilone in MCF-7 cells.**

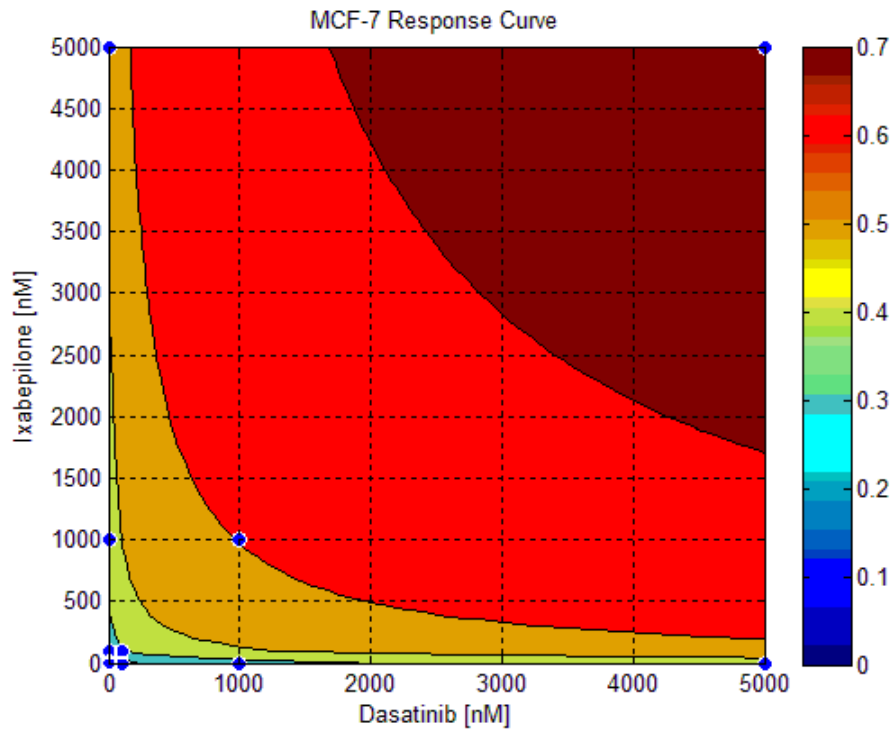

Supplement: NIHMS354418-supplement-01.pdf [file NIHMS354418-supplement-01.pdf]
